# Supplementary material
Source: MDPI journal article supplement (https://www.mdpi.com/2072-4292/11/5/554)
Supplement: s1 [file s1]

## Appendix A. Supplementary Material

### **Land Cover Changes and Their Driving Mechanisms in Central Asia from 2001 to 2017 Supported by Google Earth Engine**

**Yunfeng Hu \* and Yang Hu**

\* Corresponding author: huyf@lreis.ac.cn; Tel.: +86-10-64888020

#### **Contents**

1. Relationships of land cover types in different land classification system
2. Scripts for training point selection
3. Scripts for image pre-processing, classification, and accuracy assessment
4. Download link of reference sample points
5. Download link of land cover dataset
6. The accuracy of each land cover type and overall accuracy of reference sample points

## 1. Relationships of land cover types in different land classification system

Table S1 Relationships of land cover types in different land classification system

| Land Cover Class    | GlobeLand30            | MCD12Q1                                                                                                                                          | GlobCover 2009                                                                                                                                                                                                                                                                                                                            |
|---------------------|------------------------|--------------------------------------------------------------------------------------------------------------------------------------------------|-------------------------------------------------------------------------------------------------------------------------------------------------------------------------------------------------------------------------------------------------------------------------------------------------------------------------------------------|
| Cultivated land     | 10 Cultivated land     | 12 Croplands<br>14 Cropland/natural vegetation mosaic                                                                                            | 11 Post-flooding or irrigated croplands<br>14 Rainfed croplands<br>20 Mosaic cropland (50-70%) / vegetation (grassland, shrubland, forest) (20-50%)<br>30 Mosaic vegetation (grassland, shrubland, forest) (50-70%) / cropland (20-50%)                                                                                                   |
| Forest              | 20 Forest              | 1 Evergreen needleleaf forest<br>2 Evergreen broadleaf forest<br>3 Deciduous needleleaf forest<br>4 Deciduous broadleaf forest<br>5 Mixed forest | 40 Closed to open (>15%) broadleaved evergreen and/or semi-deciduous forest (>5m)<br>50 Closed (>40%) broadleaved deciduous forest (>5m)<br>60 Open (15-40%) broadleaved deciduous forest (>5m)<br>70 Closed (>40%) needleleaved evergreen forest (>5m)<br>90 Open (15-40%) needleleaved deciduous or evergreen forest (>5m)              |
| Grassland           | 30 Grassland           | 8 Woody savannas<br>9 Savannas<br>10 Grasslands                                                                                                  | 110 Mosaic forest-shrubland (50-70%) / grassland (20-50%)<br>120 Mosaic grassland (50-70%) / forest-shrubland (20-50%)<br>140 Closed to open (>15%) grassland<br>150 Sparse (>15%) vegetation (woody vegetation, shrubs, grassland)                                                                                                       |
| Shrubland           | 40 Shrubland           | 6 Closed shrublands<br>7 Open shrublands                                                                                                         | 130 Closed to open (>15%) shrubland (<5m)                                                                                                                                                                                                                                                                                                 |
| Wetland             | 50 Wetland             | 11 Permanent wetlands                                                                                                                            | 160 Closed (>40%) broadleaved forest regularly flooded - Fresh water<br>170 Closed (>40%) broadleaved semi-deciduous and/or evergreen forest regularly flooded - saline water<br>180 Closed to open (>15%) vegetation (grassland, shrubland, woody vegetation) on regularly flooded or waterlogged soil - fresh, brackish or saline water |
| Water bodies        | 60 Water bodies        | 0 Water                                                                                                                                          | 210 Water bodies                                                                                                                                                                                                                                                                                                                          |
| Artificial surfaces | 80 Artificial surfaces | 13 Urban and built-up                                                                                                                            | 190 Artificial surfaces and associated areas (urban areas >50%) GLOBCOVER 2009                                                                                                                                                                                                                                                            |
| Bareland            | 90 Bareland            | 16 Barren or sparsely vegetated                                                                                                                  | 200 Bare areas                                                                                                                                                                                                                                                                                                                            |

|                        |     |                        |    |              |     |                        |
|------------------------|-----|------------------------|----|--------------|-----|------------------------|
| Permanent snow and ice | 100 | Permanent snow and ice | 15 | Snow and ice | 220 | Permanent snow and ice |
|------------------------|-----|------------------------|----|--------------|-----|------------------------|

Table S2 Relationships of forest and cultivated land in different land classification system

| Land Cover Class | Global Forest Change dataset | Global Food Security Support Analysis dataset                                                                                                                                                                                                                                                                                                                                                                |
|------------------|------------------------------|--------------------------------------------------------------------------------------------------------------------------------------------------------------------------------------------------------------------------------------------------------------------------------------------------------------------------------------------------------------------------------------------------------------|
| Cultivated land  |                              | 1 Irrigated: wheat and rice<br>2 Irrigated mixed crops 1: Wheat, rice, barley, soybeans<br>3 Irrigated mixed crops 2: wheat, rice, cotton, orchards<br>4 Rainfed: wheat, rice, soybeans, sugarcane, corn, cassava<br>5 Rainfed: wheat, barley<br>6 Rainfed: corn, soybeans<br>7 Rainfed mixed crops: wheat, corn, rice, barley, soybeans<br>8 Fractions of mixed crops: wheat, maize, rice, barley, soybeans |
| Forest           | treecover2000                |                                                                                                                                                                                                                                                                                                                                                                                                              |

## 2. Scripts for training point selection

Links to the original Google Earth Engine training point selection

<https://code.earthengine.google.com/dc6f6b9c3a013b01568bf17cafb8fc12>

## 3. Scripts for image pre-processing, classification, and accuracy assessment

Links to the Google Earth Engine image pre-processing, classification, and accuracy assessment

<https://code.earthengine.google.com/7a8ee256d36d6e609ff282a20460621d>

## 4. Download link of reference sample points

Links to the Google Drive of reference sample points

<https://drive.google.com/drive/folders/1l0YB9ceNZYkqmn6IELCrv2b-MxYzJGlk?usp=sharing>

0- Forest, 1- Grassland, 2- Shrubland, 3- Cultivated land, 4- Artificial surfaces, 5- Water bodies, 6- Wetland, 7- Permanent snow and ice, 8- Bareland

## 5. Download link of land cover dataset

Links to the Google Drive of land cover dataset

<https://drive.google.com/drive/folders/12igBMOuMRw--IoB7j9KR8OV5fVEgvOwz?usp=sharing>

0- Forest, 1- Grassland, 2- Shrubland, 3- Cultivated land, 4- Artificial surfaces, 5- Water bodies, 6- Wetland, 7- Permanent snow and ice, 8- Bareland

## 6. The accuracy of each land cover type and overall accuracy of reference sample points

Table S3. The accuracy of each land cover type and overall accuracy of reference sample points

| Land cover          | Accuracy |
|---------------------|----------|
| Forest              | 100.0%   |
| Grassland           | 97.6%    |
| Shrubland           | 96.3%    |
| Cultivated land     | 100.0%   |
| Artificial surfaces | 94.1%    |

|                         |              |
|-------------------------|--------------|
| Water bodies            | 92.6%        |
| Wetland                 | 94.7%        |
| Permanent snow and ice  | 100.0%       |
| Bareland                | 90.7%        |
| <b>Overall accuracy</b> | <b>95.8%</b> |
